# Supplementary material for: Sustainable extraction of rare earth elements from coal fly ash leachates using a recyclable ionic liquid
Source: Research Square preprint supplement (doi:10.21203/rs.3.rs-7222907/v1), 2025-09-16
Supplement: Supplementary file 1 [file f261a2c79d5b741bf8120344.docx]

***Supporting Information***

**Sustainable extraction of rare earth elements from coal fly ash leachates using a recyclable ionic liquid**

**Ting Liu 1 and Ching-Hua Huang 1, ***

1 School of Civil and Environmental Engineering, Georgia Institute of Technology, 200 Bobby Dodd Way, Atlanta, GA 30332, USA; [tliu335@gatech.edu](mailto:tliu335@gatech.edu) (T.L.); [ching-hua.huang@ce.gatech.edu](mailto:ching-hua.huang@ce.gatech.edu) (C.-H.H.)

* Correspondence: [ching-hua.huang@ce.gatech.edu](mailto:ching-hua.huang@ce.gatech.edu); Tel.: +1-404-894-7694


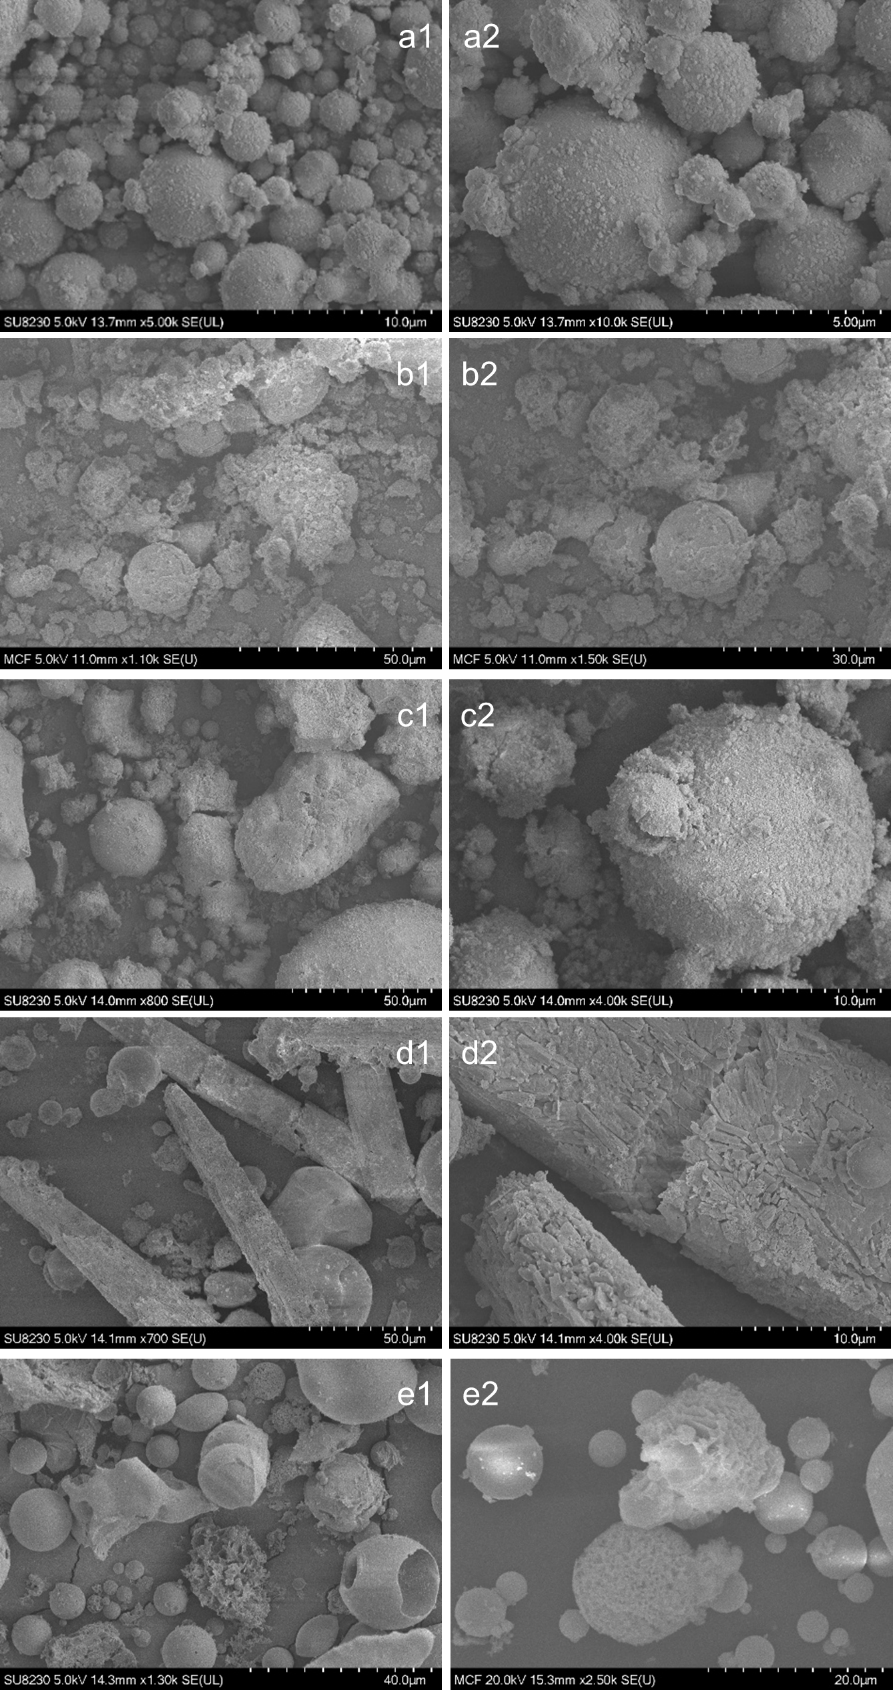


**Figure S1**. SEM images of Class C CFA under low (left) and high (right) magnifications. (a) as received; (b) after HCl leaching; (c) after HNO3 leaching; (d) after H2SO4 leaching; and (e) after citrate leaching.


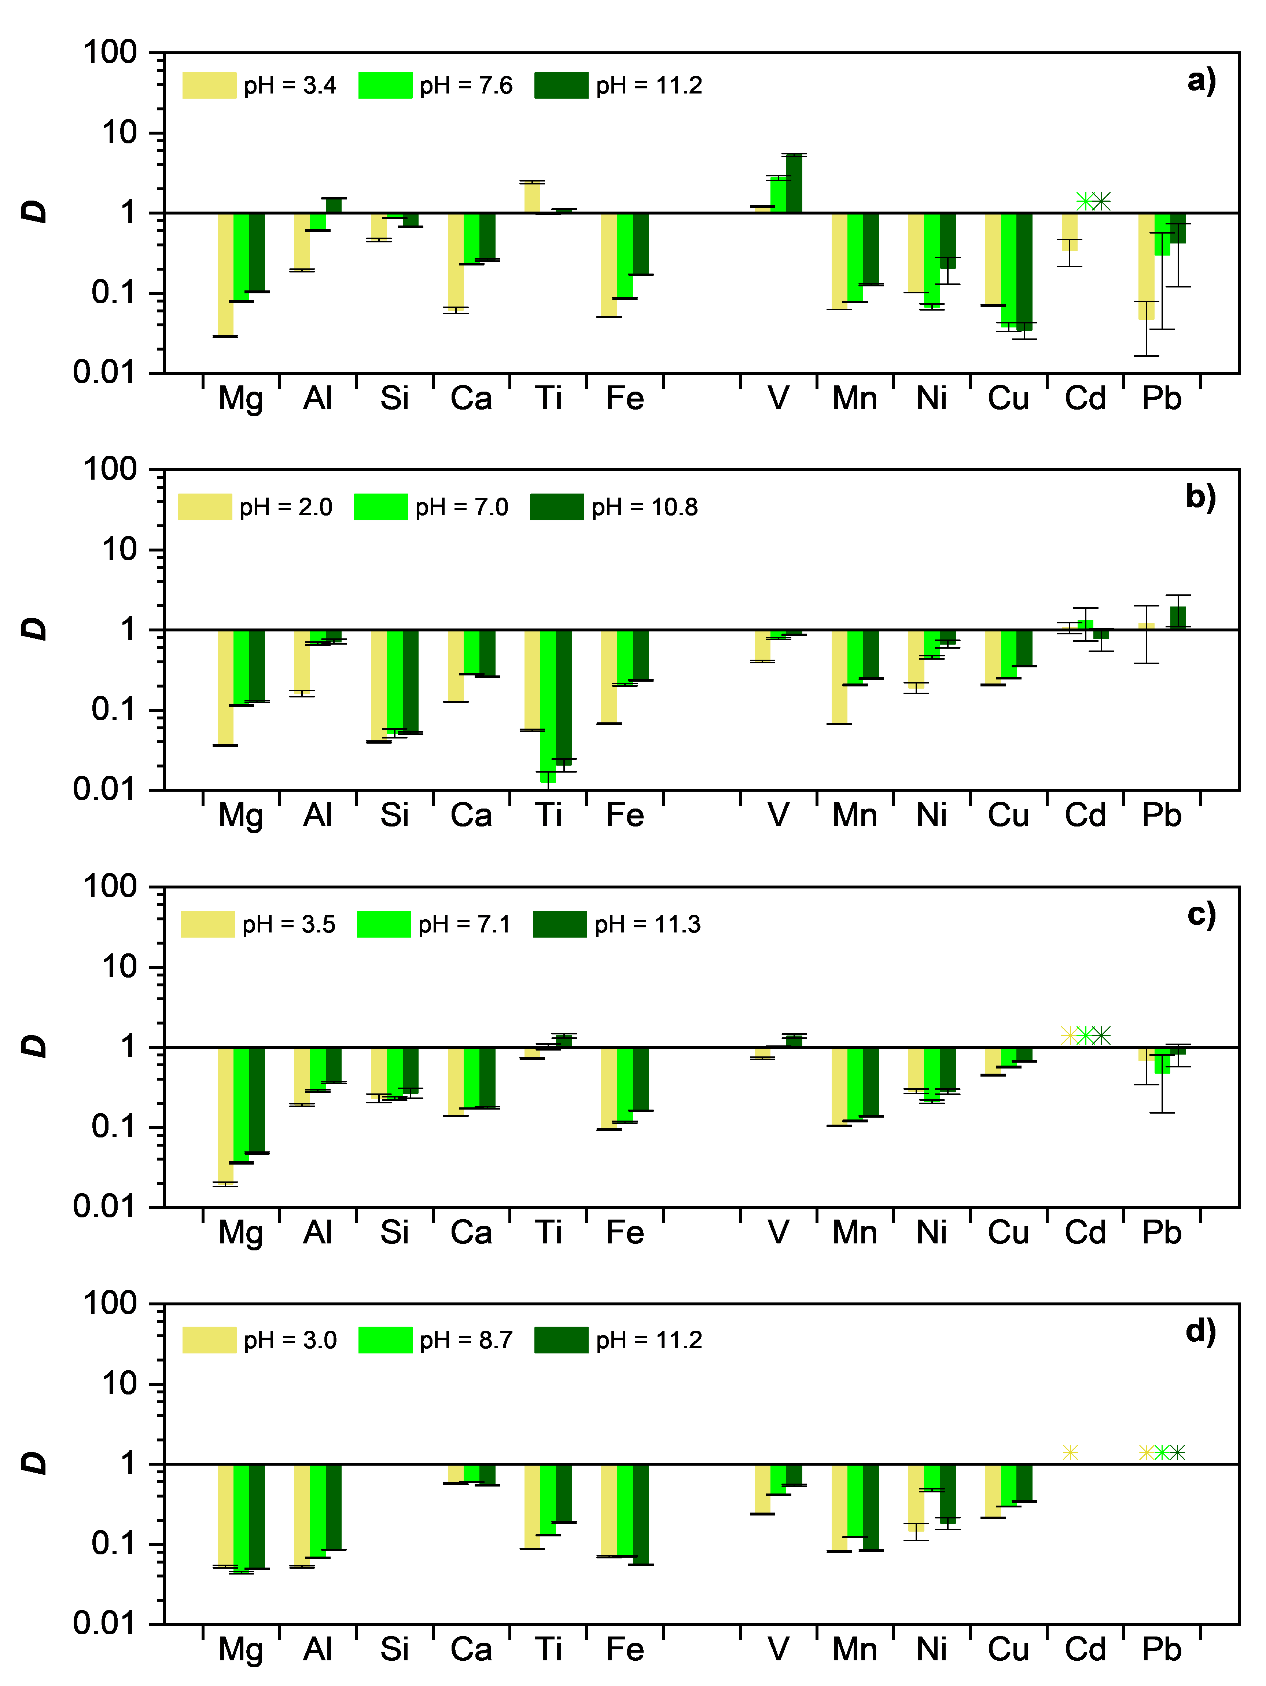


**Figure S2**. Effect of leachate pH on non-REE elements’ distribution, *D*, for extraction from (a) HCl, (b) citrate, (c) HNO3, and (d) H2SO4 leachates.


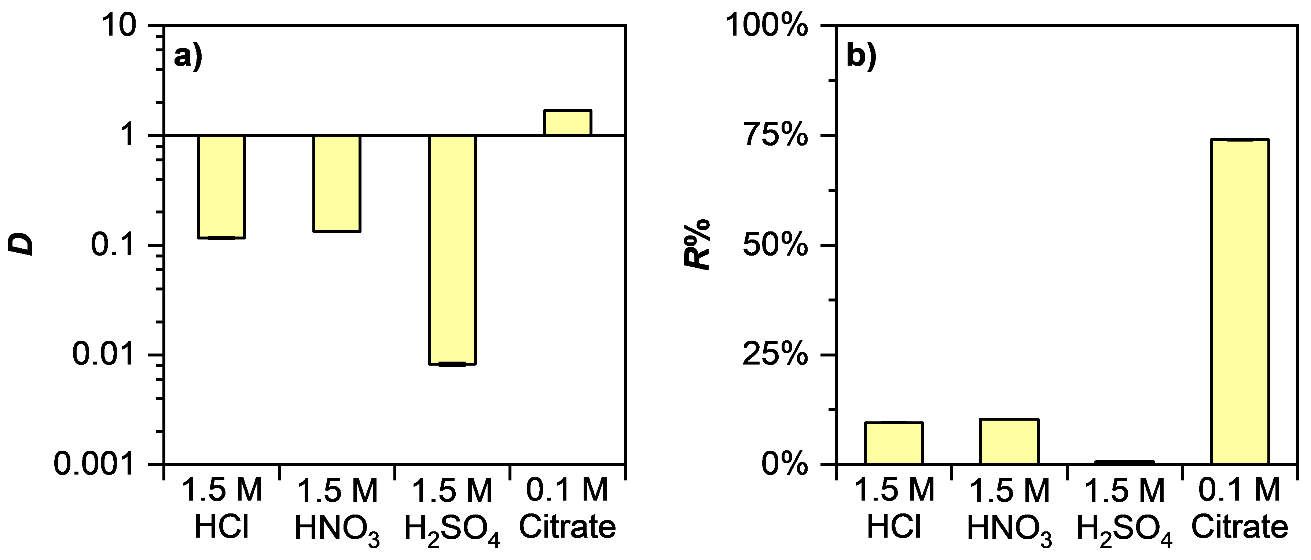


**Figure S3**. Results of (a) distribution, *D*, and (b) recovery, *R%*, of Nd in simulated AQ-IL systems. Extraction conditions: pH ~11 and 10 mg betaine/g AQ.


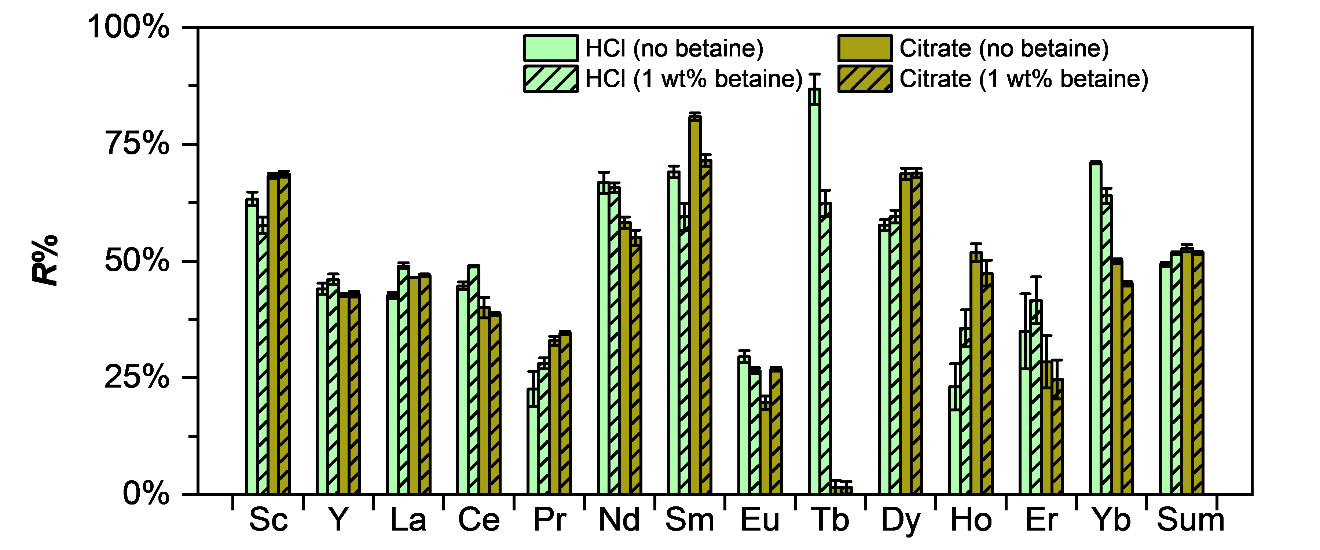


**Figure S4**. Effect of adding 1 wt% betaine to HCl and citrate leachates on REE recovery, *R%*.
